# Supplementary material for: Overexpression of syndecan-1, MUC-1, and putative stem cell markers in breast cancer leptomeningeal metastasis: a cerebrospinal fluid flow cytometry study
Source: Breast Cancer Res. 2017 Apr 11;19:46. doi: 10.1186/s13058-017-0827-4 (PMC5387324; doi:10.1186/s13058-017-0827-4)
Supplement: Supplementary file 2 — Flow cytometry characterization of cerebrospinal fluid (CSF) and peripheral blood (PB) lymphocytes in patients with breast cancer leptomeningeal metastasis. (XLSX 11 kb) [file 13058_2017_827_MOESM2_ESM.xlsx]

## Sheet: Foglio1
Peripheral blood lymphocytes immunophenotype									Cerebrospinal fluid lymphocytes immunophenotype
WBC / mm3	Lymp %	% CD3	% CD56	% CD3/CD4	% CD3/CD8	% CD3/CD56	T4/T8	% CD19	% CD3	% CD56	% CD3/CD4	% CD3/CD8	% CD3/CD56	T4/T8	% CD19
8700	4	62	31	56	37	16	1.51	12	93	9	67	32	4	2.09	1
6300	15	66	41	38	53	40	0.72	15	94	9	58	42	9	1.38	1
12400	6	66	21	53	42	14	1.26	18	92	9	63	30	4	2.1	0
nd	nd	nd	nd	nd	nd	nd	nd	nd	94	5	58	41	1	1.41	0
nd	nd	nd	nd	nd	nd	nd	nd	nd	97	6	63	36	5	1.75	1
4650	34	nd	16	54	42	11	1.28	12	96	3	68	30	1	2.26	1
4300	43	72	23	71	26	4	2.7	5	92	10	58	40	4	1.45	0
nd	nd	nd	nd	nd	nd	nd	nd	nd	98	24	68	33	30	2.06	0
5300	15	70	22	49	48	12	1.02	7	85	10	47	51	5	0.9	0
9800	37	70	40	32	67	21	0.47	1	87	19	47	53	7	0.9	3
nd	nd	nd	nd	nd	nd	nd	nd	nd	92	6	45	52	3	0.86	0
13400	5	51	49	37	62	23	0.59	9	83	14	58	43	4	1.34	3
nd	nd	nd	nd	nd	nd	nd	nd	nd	75	5	58	36	2	1.6	0
nd: not done
